# Supplementary material for: Epigenome-Wide Association Study in Peripheral Tissues Highlights DNA Methylation Profiles Associated with Episodic Memory Performance in Humans
Source: Biomedicines. 2022 Nov 3;10(11):2798. doi: 10.3390/biomedicines10112798 (PMC9687249; doi:10.3390/biomedicines10112798)
Supplement: Supplementary file 1 [file biomedicines-10-02798-s001.zip › sommerer_et_al_episodicmemory_EWAS_supplementary_tables.xlsx]

## Sheet: STable1
Supplementary Table 1: Genomic inflation factors lambda for all EWAS analyses
Dataset	Analysis	lambda
BASE-II Blood	cross-sectional	1.01369
BASE-II Blood	longitudinal	0.976282
BASE-II Buccal1	cross-sectional	1.01698
BASE-II Buccal1	longitudinal	1.02686
BASE-II Buccal2	cross-sectional	1.0271
BASE-II Buccal2	longitudinal	0.929703
BBHI	cross-sectional	0.9609
Meta-analysis	cross-sectional	1.01421
Meta-analysis	longitudinal	0.988151

## Sheet: STable2
Supplementary Table 2: Comparison of CpGs showing suggestive evidence of association with episodic memory performance in independent datasets
		This study				Sommerer et al. 2021 (1)				Sommerer et al. 2022 (2)	McCartney et al. 2022 (3)			Battram et al. 2021 (4)	Buniello et al. 2019 (5)
CpG*	Gene(s)	EMcross_effect	Emcross_P	EMlong_effect	Emlong_P	braak_effect	braak_P	adstatus_effect	adstatus_P	Buccal-Brain Correlation	cognition_effect**	cognition_PIP**	cognition_P**	EWAS catalogue	GWAS catalogue
cg25311963	MIB2	-7.15312	1.41394e-06	-0.0957926	0.934702	0.000205346	0.872688	-0.00360302	0.570879	R=0.1883, p=0.0403, q=0.3448	-3.3337e-05	0.005	0.911668
cg15402943*	SNCA, TIGD2	-6.38009	3.06947e-06	-0.812826	0.447523	NA	NA	NA	NA	R=0.0478, p=0.6054, q=0.9055	-2.87219e-05	0.008	1.11199		SNCA: Gudjonsson et al. (12), Simon-Sanchez et al. (13), Guerreiro et al. (14), Blauwendraat et al. (15)
cg18370700*	IRX4, IRX2	5.37994	3.48382e-06	0.981524	0.283499	NA	NA	NA	NA	R=0.1508, p=0.1017, q=0.5202	3.18189e-05	0.014	0.026958	IRX2: Battram et al. (6)
cg12160320*	CERS4, CD320	-5.75568	4.73747e-06	-2.04339	0.0364921	NA	NA	NA	NA	R=0.2902, p=0.0014, q=0.0424	-4.59978e-06	0.003	1.3455	CD320: Lu et al. (7)
cg13468767	DHRS7C, USP43	-2.69465	5.59967e-06	-0.533958	0.268964	NA	NA	NA	NA	R=0.7085, p=1.99E-19, q=2.14E-16	-7.77668e-05	0.01	0.284655	USP43: Battram et al. (8)
cg27110655	GLTSCR2, SEPW1	6.90449	6.39377e-06	1.3893	0.257309	-0.000938407	0.250337	0.000548088	0.895576	R=0.0049, p=0.9578, q=0.9929	7.0575e-05	0.014	0.160543	SEPW1: Zhang et al. (9), Lu et al. (7)
cg14408927	PSD3	4.57018	7.96254e-06	1.90177	0.0218845	NA	NA	NA	NA	R=0.0175, p=0.8504, q=0.9721	1.15432e-05	0.004	0.132496		PSD3: Li et al. (16), Wang et al. (17)
cg17268483	SLC27A2, HDC	13.0198	8.48112e-06	5.07446	0.0305733	-0.00132654	0.0110798	-0.00616723	0.0393297	R=-0.0294, p=0.7507, q=0.9483	5.81532e-05	0.017	0.048849	HDC: Zhang et al. (9)
cg02064414*	OXA1L, OR6J1	4.24184	9.69316e-06	0.972083	0.211475	NA	NA	NA	NA	R=0.0052, p=0.9553, q=0.9925	-0.000347334	0.034	0.00449565
cg08891989	WIPI2, SLC29A4	5.18579	0.0195595	8.96096	2.55901e-07	-0.000518109	0.28856	-0.00375739	0.12905	R=0.2, p=0.03, q=0.28	1.98065e-05	0.007	0.146667		SLC29A4: Chibnik et al. (18)
ch.13.1159947F	EDNRB, POU4F1	-5.89563	0.155637	-16.4349	5.05311e-07	NA	NA	NA	NA	R=-0.01, p=0.91, q=0.99	-1.91491e-05	0.005	1.22921
cg16525470	CARM1, YIPF2	-5.03125	0.00072286	-5.49655	7.74531e-07	0.000886722	0.0870235	0.00363948	0.132366	R=0.27, p=0, q=0.08	-1.20103e-05	0.008	1.00451		CARM1: Wang et al. (17)
cg19857541	MORC1	5.93454	0.014083	9.12761	1.05164e-06	-0.000212571	0.647924	-0.000512816	0.847129	R=-0.05, p=0.6, q=0.9	7.32515e-05	0.009	0.0180247
cg05275832	SUPT7L, MRPL33	-2.89076	0.0265865	-4.86536	1.11307e-06	0.000249006	0.613006	0.00140604	0.568495	R=0.11, p=0.23, q=0.7	-2.98379e-05	0.01	0.825695		MRPL33: Davies et al. (19)
cg14744604*	ITPK1, CHGA	-1.36098	0.359734	-5.49799	2.50111e-06	NA	NA	NA	NA	R=0.06, p=0.53, q=0.88	-2.47103e-06	0.004	1.20254	ITPK1: Battram et al. (10), Zhang et al. (9)	ITPK1: Wang et al. (17)
cg19531475*	C1QTNF9B	-4.2815	0.0204615	-7.04246	4.55013e-06	NA	NA	NA	NA	R=0, p=0.97, q=1	-4.96742e-07	0.004	1.05341
cg21390166*	BCRP2, SLC7A4, GGT2	-1.8421	0.100401	-4.12652	4.76132e-06	NA	NA	NA	NA	NA	-8.57711e-06	0.006	1.32553
cg18632612*	COL22A1, KCNK9	1.23684	0.252968	3.70169	6.20685e-06	NA	NA	NA	NA	R=0.1, p=0.27, q=0.73	3.16635e-05	0.004	0.172787		COL22A1: Wang et al. (17), Naqvi et al. (20), van der Meer et al. (21), Li et al. (16)
cg19100344*	C1orf131, GNPAT	1.48454	0.205863	4.00371	7.49907e-06	NA	NA	NA	NA	R=0, p=0.97, q=0.99	4.53254e-05	0.014	0.088493
cg16655166	LOC339788, ID2	-0.0798789	0.955989	5.03826	7.96175e-06	NA	NA	NA	NA	R=0.14, p=0.12, q=0.55	1.05986e-05	0.004	0.407238
cg27184903	APBA2, NDNL2	6.22473	0.000392974	6.01142	8.79459e-06	-5.29049e-05	0.941489	0.00167706	0.63231	R=-0.1, p=0.27, q=0.73	3.00965e-05	0.008	0.0775258	APBA2: Vallerga et al. (11)
* indicate CpGs that are exclusive to the EPIC array (not present on the 450K array)
** from the six phenotypes in the McCartney et al. (3) study, the statistics with the lowest p-value and same effect direction were chosen
grey highlight = CpGs not associated at FDR <0.05 with DNA sequence variants in an mQTL GWAS in buccal samples (m.s. in preparation)
(1)Sommerer et al. Entorhinal cortex EWAS meta-analysis highlights four novel loci showing differential methylation in Alzheimer’s disease. bioRxiv 2021
(2)Sommerer et al. A correlation map of genome-wide DNA methylation patterns between paired human brain and buccal samples. bioRXiv 2021
(3)McCartney et al. Blood-based epigenome-wide analyses of cognitive abilities. Genome Biol 2022
(4)Battram et al. The EWAS Catalog: A Database of Epigenome-wide Association Studies. OSF Preprints 2021
(5)Buniello et al. The NHGRI-EBI GWAS Catalog of published genome-wide association studies, targeted arrays and summary statistics. Nucleic Acids Res. 2019
(6)Battram et al., reanalysis of DNA methylation analysis on purified neurons and glia dissects age and Alzheimer's disease-specific changes in the human cortex, Gasparoni et al., Epigenetics and Chromatin 2018; phenotype: AD
(7)Lu et al., DNA methylation study of Huntington's disease and motor progression in patients and in animal models. Nat Commun 2020; phenotype: Huntington's disease
(8)Battram et al., reanalysis of An epigenetic signature in peripheral blood associated with the haplotype on 17q21.31, a risk factor for neurodegenerative tauopathy. PLoS Genet 2014; phenotype: Progressive supranuclear palsy
(9)Zhang et al., Epigenome-wide meta-analysis of DNA methylation differences in prefrontal cortex implicates the immune processes in Alzheimer's disease, Nat Commun 2020; phenotype: AD
(10)Battram et al., reanalysis of Elevated DNA methylation across a 48-kb region spanning the HOXA gene cluster is associated with Alzheimer's disease neuropathology. Alzheimers Dement 2018; phenotype: AD
(11)Vallerga et al., Analysis of DNA methylation associates the cystine-glutamate antiporter SLC7A11 with risk of Parkinson's disease, Nat Commun 2020; phenotype: Parkinson disease
(12)Gudjonsson et al., A genome-wide association study of serum proteins reveals shared loci with common diseases. Nat Commun 2022; phenotype: serum levels of protein SNCA
(13)Simon-Sanchez et al., Genome-wide association study reveals genetic risk underlying Parkinson's disease. Nat Genet 2009; phenotype: Parkinson disease
(14)Guerreiro et al., Investigating the genetic architecture of dementia with Lewy bodies: a two-stage genome-wide association study. Lancet Neurol 2018; phenotype: Dementia with Lewy bodies
(15)Blauwendraat et al., Parkinson's disease age at onset genome-wide association study: Defining heritability, genetic loci, and α-synuclein mechanisms. MovDisord 2019; phenotype: age at onset, Parkinson disease
(16)Li et al., Variations in the FRA10AC1 Fragile Site and 15q21 Are Associated with Cerebrospinal Fluid Aβ1-42 Level. PLoS One, 2015; phenotype: cognitive decline measurement
(17)Wang et al., Genome-wide interaction analysis of pathological hallmarks in Alzheimer's disease. Neurobiol Aging, 2020; phenotype: PHF-tau measurement
(18)Chibnik et al., Susceptibility to neurofibrillary tangles: role of the PTPRD locus and limited pleiotropy with other neuropathologies. Mol Psychiatry 2017; phenotype: Neuropathologic traits (pleiotropy)
(19)Davies et al., Study of 300,486 individuals identifies 148 independent genetic loci influencing general cognitive function. Nat Commun 2018; phenotype: general cognitive ability
(20)Naqvi et al., Shared heritability of human face and brain shape. Nat Genet 2021; phenotype: brain shape
(21)van der Meer et al., The genetic architecture of human cortical folding. Sci Adv 2021; phenotype: vertex-wise sulcal depth

## Sheet: STable3
Supplementary Table 3: Number of CpGs used for the cognition PES calculation based on each phenotype and P-value threshold
Phenotype	P-value threshold	# CpGs before clumping	# CpGs after clumping
Vocabulary*	All CpGs (1)	700491	25609
	< 1E-4 (2)	2811	2484
	< 1E-5 (3)	1352	1242
	< 1E-6 (4)	775	715
	< 1E-7 (5)	490	463
	<9E-8 (6)	490	463
Digit*	All CpGs (1)	700269	25609
	< 1E-4 (2)	419	405
	< 1E-5 (3)	218	211
	< 1E-6 (4)	133	128
	< 1E-7 (5)	96	91
	<9E-8 (6)	96	91
g*	All CpGs (1)	700544	25609
	< 1E-4 (2)	2355	2106
	< 1E-5 (3)	981	923
	< 1E-6 (4)	524	504
	< 1E-7 (5)	308	302
	<9E-8 (6)	308	302
gf*	All CpGs (1)	700487	25609
	< 1E-4 (2)	642	616
	< 1E-5 (3)	272	267
	< 1E-6 (4)	163	160
	< 1E-7 (5)	118	116
	<9E-8 (6)	118	116
LM*	All CpGs (1)	699507	25603
	< 1E-4 (2)	22	22
	< 1E-5 (3)	12	12
	< 1E-6 (4)	7	7
	< 1E-7 (5)	4	4
	<9E-8 (6)	4	4
Verbal*	All CpGs (1)	699029	25608
	< 1E-4 (2)	442	429
	< 1E-5 (3)	267	260
	< 1E-6 (4)	166	165
	< 1E-7 (5)	118	117
	<9E-8 (6)	118	117
AD Case Control°	All CpGs (1)	300505	20386
	< 1E-4 (2)	184	177
	< 1E-5 (3)	39	36
	< 1E-6 (4)	14	13
	< 1E-7 (5)	4	4
	<9E-8 (6)	4	4
AD Braak Stage°	All CpGs (1)	300505	20386
	< 1E-4 (2)	276	261
	< 1E-5 (3)	70	65
	< 1E-6 (4)	23	20
	< 1E-7 (5)	5	5
	<9E-8 (6)	5	5
*McCartney, D.L., Hillary, R.F., Conole, E.L.S. et al. Blood-based epigenome-wide analyses of cognitive abilities. Genome Biol 23, 26 (2022). https://doi.org/10.1186/s13059-021-02596-5
°Sommerer Y, et al. Entorhinal cortex EWAS meta-analysis highlights four novel loci showing differential methylation in Alzheimer’s disease. bioRxiv

## Sheet: STable4
Supplementary Table 4: Variance in cross-sectional episodic memory performance explained by each cognition PES
Dataset	Cross-Sectional EM
	BASE-II Blood			BASE-II Buccals			BBHI Buccal
Samplesize
PES Phenotype	R^2	P	P_Bonferroniadj	R^2	P	P_Bonferroniadj	R^2	P	P_Bonferroniadj
Digit_1	0.00173969	0.235588	1	0.000255334	0.678873	1	3.18869e-05	0.911744	1
Digit_2	0.00117905	0.328917	1	0.000641794	0.511547	1	9.67985e-06	0.951304	1
Digit_3	0.0011411	0.33683	1	0.000835831	0.453763	1	3.66187e-05	0.90545	1
Digit_4	0.00115941	0.33298	1	0.000326512	0.639662	1	4.23361e-05	0.898374	1
Digit_5	0.00104812	0.35733	1	0.000220032	0.700745	1	2.73089e-05	0.918301	1
Digit_all	0.00279397	0.132704	1	0.00412432	0.0958026	0.958026	6.01196e-07	0.987857	1
g_1	0.0069429	0.0176587	0.176587	0.000212994	0.705343	1	0.000702255	0.60288	1
g_2	0.00577775	0.0304792	0.304792	3.45286e-05	0.879002	1	0.00429657	0.197655	1
g_3	0.00585664	0.0293633	0.293633	7.25893e-05	0.825302	1	0.00357765	0.239875	1
g_4	0.00580114	0.0301439	0.301439	5.34452e-05	0.849779	1	0.00291134	0.289141	1
g_5	0.00554619	0.0340166	0.340166	3.34911e-05	0.88082	1	0.00282847	0.296122	1
g_all	0.00781625	0.0117994	0.117994	0.00267611	0.179878	1	0.00331628	0.257859	1
gf_1	0.00295869	0.121797	1	0.000280407	0.664393	1	0.000123901	0.827045	1
gf_2	0.00243124	0.160796	1	0.000216788	0.702854	1	1.93926e-05	0.931118	1
gf_3	0.00231264	0.171398	1	9.70313e-05	0.798566	1	6.57482e-07	0.987302	1
gf_4	0.0027027	0.139214	1	5.60852e-05	0.846159	1	2.54004e-07	0.992107	1
gf_5	0.00263768	0.144069	1	4.33819e-05	0.864508	1	7.61377e-06	0.956807	1
gf_all	0.00465727	0.0521221	0.521221	0.00293252	0.160317	1	2.793e-06	0.973831	1
LM_1	8.43067e-05	0.794101	1	0.001273	0.355149	1	1.89103e-06	0.978466	1
LM_2	0.000214065	0.67749	1	6.80507e-06	0.946118	1	0.000108779	0.837787	1
LM_3	6.44069e-05	0.819556	1	0.000458071	0.579206	1	0.000309422	0.729867	1
LM_4	6.09586e-05	0.824372	1	0.000221522	0.699783	1	0.000297162	0.735068	1
LM_5	0.000409771	0.564995	1	0.00113001	0.383678	1	0.000113017	0.834702	1
LM_all	0.00150634	0.269764	1	0.000749952	0.477946	1	8.1305e-05	0.859515	1
verbal_1	0.000563466	0.499798	1	0.00150896	0.314049	1	0.00141622	0.459919	1
verbal_2	0.00031461	0.61412	1	0.000100124	0.795451	1	0.0015123	0.445071	1
verbal_3	0.000406794	0.566412	1	0.000128211	0.76925	1	5.83923e-05	0.88077	1
verbal_4	0.000273594	0.638225	1	1.40408e-05	0.922665	1	0.00282127	0.296739	1
verbal_5	0.000331437	0.604799	1	0.000102586	0.793008	1	0.00179317	0.40562	1
verbal_all	0.000586655	0.491102	1	0.00167696	0.288519	1	0.00288559	0.291288	1
Vocabulary_1	0.00553395	0.0342151	0.342151	0.000539953	0.547118	1	0.00127466	0.483273	1
Vocabulary_2	0.00382366	0.0785154	0.785154	0.000135187	0.763237	1	0.000600539	0.630447	1
Vocabulary_3	0.00490883	0.0461501	0.461501	0.000135931	0.762606	1	0.00118308	0.499438	1
Vocabulary_4	0.00409252	0.0687135	0.687135	0.000120506	0.7761	1	0.000770274	0.585831	1
Vocabulary_5	0.00383225	0.07818	0.7818	6.37922e-05	0.836069	1	0.000266328	0.748702	1
Vocabulary_all	0.00512985	0.0414968	0.414968	0.00419077	0.0931627	0.931627	0.000566324	0.640367	1
adcasectrl_1	0.000239829	0.659785	1	0.000709277	0.490137	1	0.00333784	0.256315	1
adcasectrl_2	3.15264e-07	0.987267	1	0.000530835	0.550522	1	0.00223235	0.353399	1
adcasectrl_3	5.52918e-05	0.832608	1	0.00803793	0.0199371	0.199371	0.00299925	0.281962	1
adcasectrl_all	1.92201e-08	0.996856	1	0.000335146	0.63527	1	0.000570182	0.63923	1
braakstage_1	0.000103418	0.772534	1	0.000436658	0.588214	1	0.00147324	0.451015	1
braakstage_2	0.000187661	0.696984	1	1.67376e-06	0.973262	1	0.00175192	0.41108	1
braakstage_3	0.000819734	0.415659	1	0.0155051	0.00119966	0.0119966	0.000433038	0.682899	1
braakstage_all	0.000127017	0.748701	1	8.83834e-05	0.807568	1	0.00174314	0.412256	1
meta_adcasectrl_1	0.0023189	0.170819	1	0.000522988	0.553483	1	0.0201275	0.00508387	0.0508387
meta_adcasectrl_2	1.05211e-06	0.976741	1	0.00249436	0.195414	1	0.00931461	0.057475	0.57475
meta_adcasectrl_3	7.15924e-08	0.993932	1	0.00188948	0.259875	1	0.00317754	0.268079	1
meta_adcasectrl_4	0.00059337	0.488631	1	0.000128027	0.76941	1	0.000207938	0.777131	1
meta_adcasectrl_5	3.28938e-06	0.958886	1	0.000681353	0.498808	1	0.000410538	0.690812	1
meta_adcasectrl_all	0.00118088	0.328542	1	0.00141227	0.330082	1	0.0129244	0.0250811	0.250811
meta_braakstage_1	0.000897239	0.394434	1	0.000574458	0.53458	1	0.0277523	0.000975496	0.00975496
meta_braakstage_2	0.00187883	0.217707	1	0.000951008	0.424214	1	7.36359e-06	0.957522	1
meta_braakstage_3	8.37167e-06	0.934455	1	0.00208807	0.236225	1	0.00109057	0.516717	1
meta_braakstage_4	0.000961724	0.377944	1	0.000819102	0.458319	1	0.000208545	0.776814	1
meta_braakstage_5	0.000426035	0.557372	1	0.000776976	0.470118	1	0.000782115	0.582963	1
meta_braakstage_all	0.000649266	0.468832	1	0.00130362	0.349423	1	0.0213557	0.00388973	0.0388973

## Sheet: STable5
Supplementary Table 5: Variance in longitudinal episodic memory performance explained by each cognition PES
Dataset	Longitudinal EM
	BASE-II Blood			BASE-II Buccals
Samplesize
PES Phenotype	R^2	P	P_Bonferroniadj	R^2	P	P_Bonferroniadj
Digit_1	0.00147565	0.29736	1	0.00114161	0.399797	1
Digit_2	0.00139204	0.311474	1	0.00057673	0.549595	1
Digit_3	0.00151936	0.290309	1	0.000400413	0.618091	1
Digit_4	0.00164655	0.270962	1	0.00023733	0.701117	1
Digit_5	0.00176232	0.254733	1	0.000182165	0.736678	1
Digit_all	0.00204803	0.219494	1	0.000137665	0.77005	1
g_1	0.00111898	0.364201	1	0.0016807	0.306893	1
g_2	0.00126104	0.335395	1	0.00101167	0.428016	1
g_3	0.00127703	0.332348	1	0.00100089	0.430489	1
g_4	0.00114363	0.358967	1	0.00115201	0.397657	1
g_5	0.00117955	0.351524	1	0.0010863	0.411463	1
g_all	0.000349448	0.612172	1	0.00127949	0.372708	1
gf_1	0.000174582	0.7201	1	0.00348131	0.14123	1
gf_2	0.000185785	0.711648	1	0.00240729	0.221303	1
gf_3	0.000269182	0.656356	1	0.00233659	0.22822	1
gf_4	0.000307612	0.634319	1	0.00217667	0.244854	1
gf_5	0.000274955	0.65293	1	0.002288	0.233126	1
gf_all	0.00015826	0.732982	1	0.00157879	0.32204	1
LM_1	0.00210385	0.21331	1	0.00132132	0.365002	1
LM_2	0.000170994	0.722872	1	0.00120616	0.386778	1
LM_3	0.00133069	0.322388	1	3.87128e-07	0.987633	1
LM_4	0.000977137	0.396494	1	5.39195e-05	0.85485	1
LM_5	0.000193075	0.706302	1	0.000984152	0.434372	1
LM_all	0.00173777	0.258072	1	0.000189858	0.731386	1
verbal_1	0.000253656	0.665796	1	0.000192306	0.729727	1
verbal_2	9.13385e-05	0.7955	1	7.57366e-05	0.828357	1
verbal_3	0.000218252	0.688681	1	0.000203079	0.722563	1
verbal_4	0.000268343	0.656858	1	7.47099e-05	0.829507	1
verbal_5	0.00026629	0.65809	1	9.17888e-05	0.811351	1
verbal_all	4.615e-05	0.853837	1	0.000652335	0.524521	1
Vocabulary_1	0.00349289	0.108685	1	0.000651015	0.524941	1
Vocabulary_2	0.0034776	0.109463	1	0.000493764	0.579821	1
Vocabulary_3	0.00447774	0.06926	0.6926	0.00065459	0.523804	1
Vocabulary_4	0.0045947	0.065717	0.65717	0.000526082	0.567673	1
Vocabulary_5	0.00485501	0.0585057	0.585057	0.000925502	0.448409	1
Vocabulary_all	0.000860826	0.426141	1	0.000510813	0.57335	1
adcasectrl_1	0.0064213	0.0295068	0.295068	3.22405e-05	0.88751	1
adcasectrl_2	0.00281093	0.150211	1	0.000774361	0.488067	1
adcasectrl_3	0.00153741	0.287459	1	0.0043185	0.101221	1
adcasectrl_all	0.00468061	0.0632376	0.632376	5.97783e-05	0.847259	1
braakstage_1	0.00794644	0.015421	0.15421	0.000253849	0.691406	1
braakstage_2	5.42471e-05	0.841689	1	0.00165671	0.310373	1
braakstage_3	0.000129236	0.757859	1	0.00586489	0.0560343	0.560343
braakstage_all	0.00220875	0.202239	1	3.53048e-05	0.882323	1
meta_adcasectrl_1	0.00124306	0.338868	1	0.000827703	0.473448	1
meta_adcasectrl_2	0.000616134	0.500801	1	0.00147937	0.337779	1
meta_adcasectrl_3	0.000221315	0.686619	1	0.000834711	0.47158	1
meta_adcasectrl_4	0.00013058	0.756644	1	0.0019281	0.273755	1
meta_adcasectrl_5	0.000158527	0.732765	1	0.000322515	0.654563	1
meta_adcasectrl_all	0.00265551	0.161996	1	0.000460053	0.59306	1
meta_braakstage_1	0.000687795	0.476888	1	0.000117468	0.787148	1
meta_braakstage_2	3.10462e-06	0.96189	1	1.91485e-05	0.913191	1
meta_braakstage_3	2.46117e-05	0.892981	1	0.000214956	0.714909	1
meta_braakstage_4	0.000494234	0.546544	1	0.00132112	0.365037	1
meta_braakstage_5	4.16894e-05	0.861005	1	0.000129629	0.776679	1
meta_braakstage_all	0.000224625	0.684409	1	0.000641489	0.52799	1

## Sheet: STable6
Supplementary Table 6: Spearman rank correlation of DNAm and gene expression in entorhinal cortex using only healthy controls across N=93 samples
cpg	cpg source	gene id	status	correlation measure	correlation value	p value	fdr bh
cg27184903	Longitudinal EM	ENSG00000034053	control	Spearman's rho	0.34	2.1e-05	0.00047
cg27184903	Longitudinal EM	ENSG00000185115	control	Spearman's rho	0.34	2.2e-05	0.00047
cg17268483	Cross-sectional EM	ENSG00000140284	control	Spearman's rho	-0.25	0.0016	0.019
cg05275832	Longitudinal EM	ENSG00000119760	control	Spearman's rho	-0.21	0.0074	0.056
cg18370700	Cross-sectional EM	ENSG00000170561	control	Spearman's rho	0.14	0.08	0.37
cg02064414	Cross-sectional EM	ENSG00000155463	control	Spearman's rho	-0.12	0.13	0.51
cg18632612	Longitudinal EM	ENSG00000169427	control	Spearman's rho	0.12	0.14	0.51
cg14744604	Longitudinal EM	ENSG00000100604	control	Spearman's rho	-0.1	0.2	0.61
cg18632612	Longitudinal EM	ENSG00000169436	control	Spearman's rho	-0.096	0.23	0.61
cg19857541	Longitudinal EM	ENSG00000114487	control	Spearman's rho	0.081	0.31	0.69
cg27110655	Cross-sectional EM	ENSG00000178980	control	Spearman's rho	-0.08	0.32	0.69
cg12160320	Cross-sectional EM	ENSG00000167775	control	Spearman's rho	0.077	0.34	0.69
cg25311963	Cross-sectional EM	ENSG00000197530	control	Spearman's rho	0.063	0.43	0.7
cg16525470	Longitudinal EM	ENSG00000130733	control	Spearman's rho	-0.062	0.44	0.7
cg27110655	Cross-sectional EM	ENSG00000105373	control	Spearman's rho	-0.061	0.45	0.7
cg12160320	Cross-sectional EM	ENSG00000090661	control	Spearman's rho	0.061	0.45	0.7
cg14744604	Longitudinal EM	ENSG00000100605	control	Spearman's rho	-0.048	0.55	0.77
cg05275832	Longitudinal EM	ENSG00000243147	control	Spearman's rho	-0.048	0.55	0.77
cg02064414	Cross-sectional EM	ENSG00000255804	control	Spearman's rho	-0.042	0.6	0.8
cg16525470	Longitudinal EM	ENSG00000142453	control	Spearman's rho	0.034	0.67	0.85
cg08891989	Longitudinal EM	ENSG00000164638	control	Spearman's rho	-0.024	0.76	0.91
cg08891989	Longitudinal EM	ENSG00000157954	control	Spearman's rho	0.013	0.87	0.94
cg19531475	Longitudinal EM	ENSG00000205863	control	Spearman's rho	-0.0083	0.92	0.94

## Sheet: STable7
Supplementary Table 7; A: Pearson correlation of chronological age and Horvath multi-tissue DNAm age; B: test statistics of association tests between DNAm age acceleration and cross-sectional / longitudinal episodic memory performance
A
Dataset	DNAm age / chronological age correlation
	R	P
BASE-II Blood	0.5	2.56e-51
BASE-II Buccal1	0.29	1.26e-09
BASE-II Buccal2	0.36	8.77e-09
BBHI	0.7	5e-51
B
Dataset	Cross-Sectional EM		Longitudinal EM
	Effect	P	Effect	P
BASE-II Blood	0.02	0.17	0.01	0.1
BASE-II Buccal1	0.02	0.17	0.03	0.01
BASE-II Buccal2	-0.01	0.5	0.000182	0.99
BBHI	0.03	0.32	NA	NA
